# Supplementary material
Source: PubMed Central journal article supplement (PMC5437343)

Fig. S1

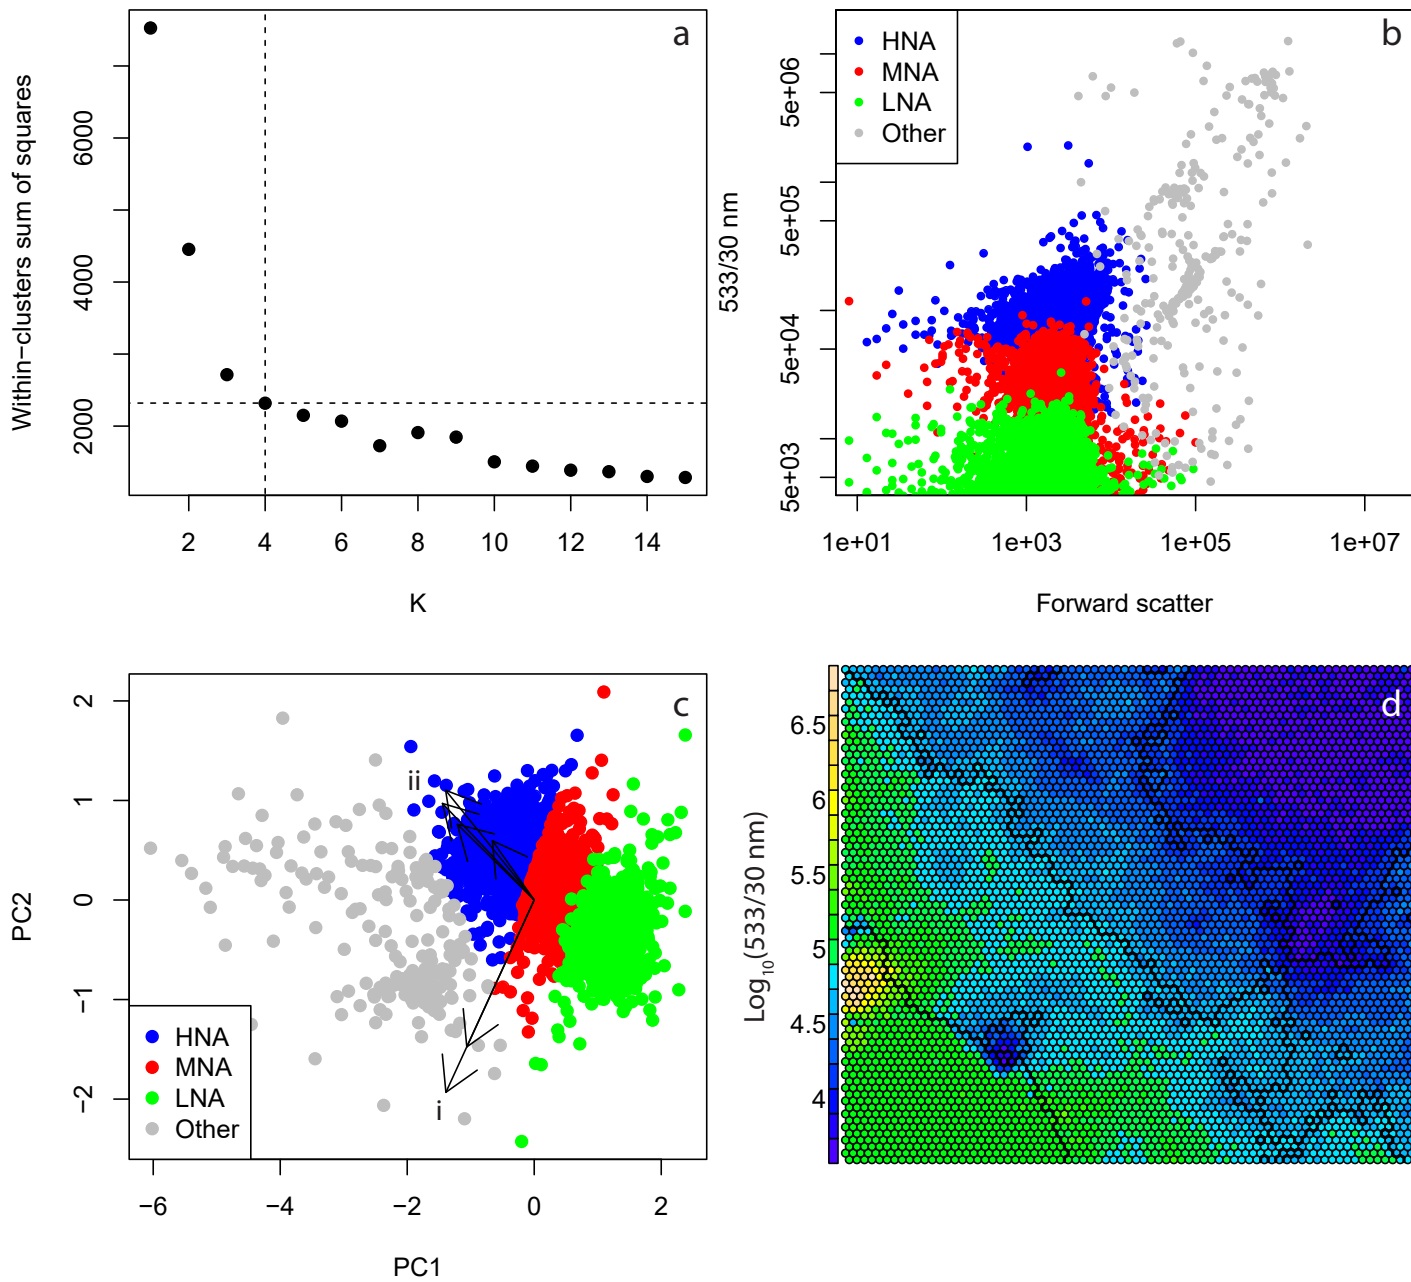

Supplement: ismej2016204x1.pdf [file ismej2016204x1.pdf]

Fig. S2

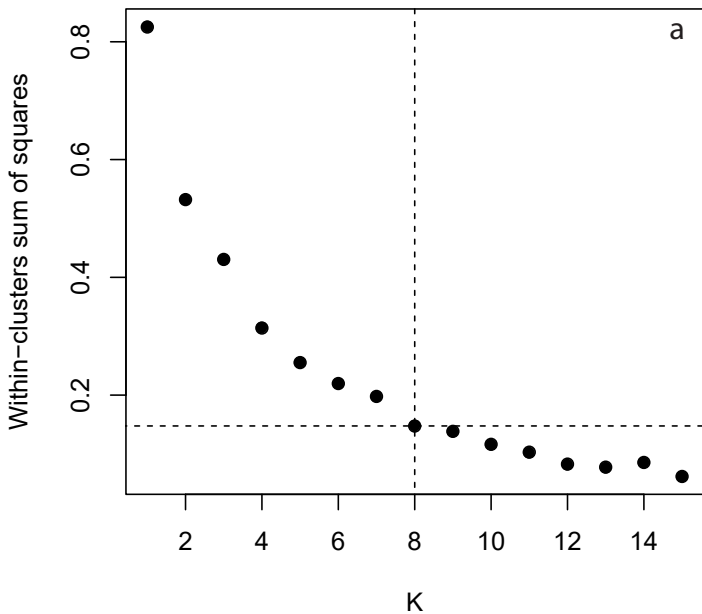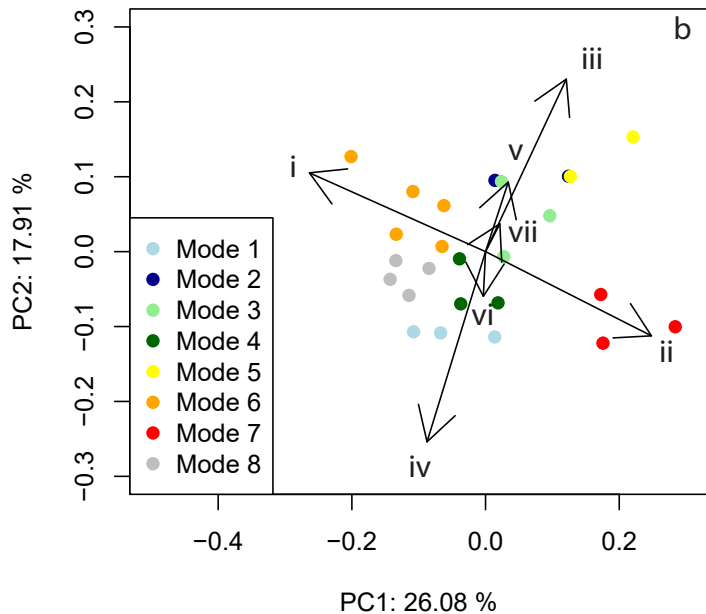

Supplement: ismej2016204x2.pdf [file ismej2016204x2.pdf]
